# Supplementary material
Source: PubMed Central journal article supplement (PMC7170902)
Supplement: 41437_2020_310_MOESM1_ESM.pdf [file 41437_2020_310_MOESM1_ESM.pdf]

**Table S1.** Statistics of microsatellite markers computed using GENALEX (Peakall and Smouse, 2006): Mean and SE per family of sample size (N), number of alleles (Na) and effective number of alleles (Ne).

Peakall R O D, Smouse P E (2006). GENALEX 6: genetic analysis in Excel. Population genetic 7 software for teaching and research. *Mol Ecol Resour* **6**: 288-295.

|           |             | Tspe52d | Tspe52b | Tspe52k | Ttsu56d | Tspe53a | Ttsu55a | Ttsu59j | Tspe51i | Ttsu58i | Tspe51a | Tspe51o | Tspe51b | Tspe51d | Tspe52a | Tspe53b | Ttsu57 |
|-----------|-------------|---------|---------|---------|---------|---------|---------|---------|---------|---------|---------|---------|---------|---------|---------|---------|--------|
| <b>N</b>  | <b>Mean</b> | 14,786  | 14,743  | 14,786  | 14,800  | 13,586  | 14,743  | 14,614  | 14,771  | 14,757  | 14,600  | 14,729  | 13,729  | 14,814  | 14,714  | 14,714  | 14,557 |
|           | SE          | 0,084   | 0,097   | 0,088   | 0,085   | 0,101   | 0,088   | 0,138   | 0,079   | 0,085   | 0,101   | 0,136   | 0,089   | 0,087   | 0,096   | 0,087   | 0,125  |
| <b>Na</b> | <b>Mean</b> | 3,357   | 3,557   | 3,043   | 3,100   | 2,457   | 3,386   | 3,414   | 3,557   | 3,371   | 3,086   | 3,314   | 3,343   | 2,886   | 3,086   | 3,157   | 3,014  |
|           | SE          | 0,093   | 0,101   | 0,103   | 0,122   | 0,128   | 0,110   | 0,103   | 0,107   | 0,096   | 0,103   | 0,101   | 0,104   | 0,111   | 0,090   | 0,090   | 0,103  |
| <b>Ne</b> | <b>Mean</b> | 2,836   | 3,024   | 2,557   | 2,611   | 2,116   | 2,840   | 2,912   | 3,014   | 2,917   | 2,601   | 2,896   | 2,827   | 2,408   | 2,633   | 2,705   | 2,538  |
|           | SE          | 0,084   | 0,092   | 0,101   | 0,107   | 0,109   | 0,103   | 0,098   | 0,089   | 0,101   | 0,096   | 0,097   | 0,091   | 0,094   | 0,085   | 0,085   | 0,099  |

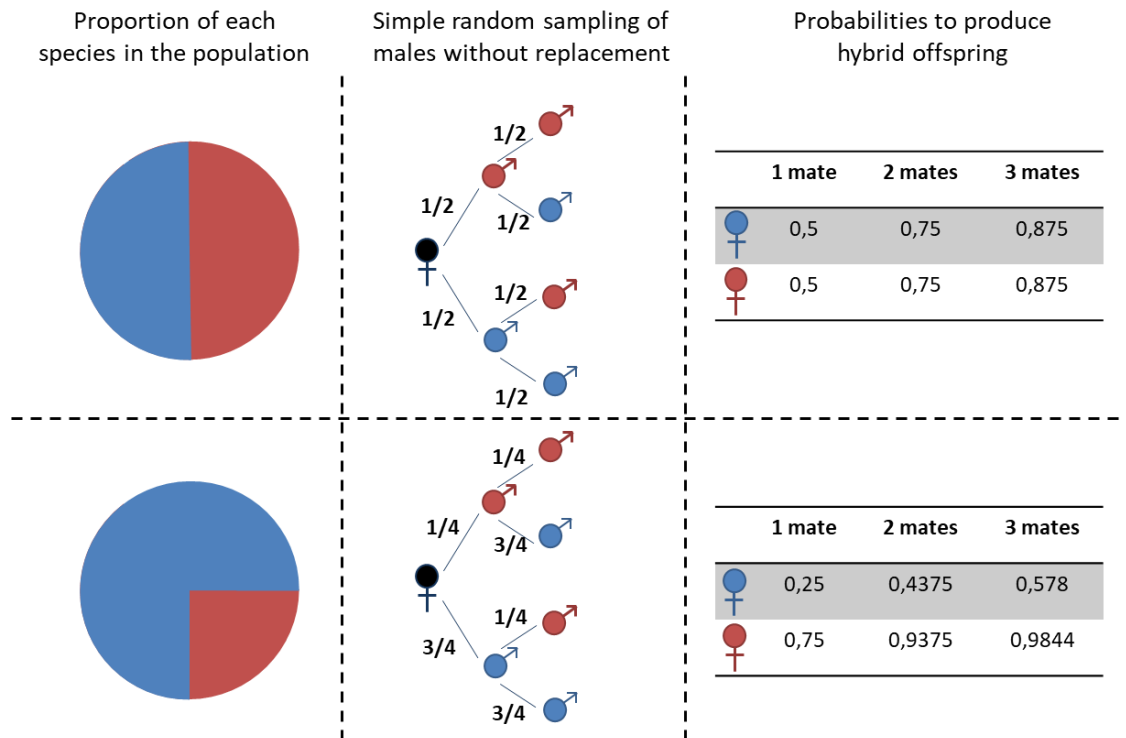

**Figure S1.** Statistical view of the role of polyandry showing that it should spread hybridization faster than monandry. We hypothesize here that females mate randomly with males of both species (red and blue) according to their proportions in the population (left panel). Mates per female therefore correspond to a random sampling of one or two males without replacement (central panel). More mates, whatever the female species (red or blue), systematically leads to an increase of the probability of producing hybrid offspring (right panel).
